# Supplementary material for: Initial Sequencing and Characterization of the Gastrointestinal and Oral Microbiota in Urban Pakistani Adults
Source: Front Cell Infect Microbiol. 2020 Aug 7;10:409. doi: 10.3389/fcimb.2020.00409 (PMC7428047; doi:10.3389/fcimb.2020.00409)
Supplement: Supplementary file 1 [file Table_1.XLSX]

## Sheet: metadata_gut_mouth_combined
Participant ID	Stool sample?	Oral sample?	BMI	Eat honey?	Eat goat/lamb meat?	Eat chicken/fish?	Eat beef?	Eat rice?	Eat naan/roti?	Eat vegetables?	Do you eat fresh fruits everyday?	Do you smoke?	Antibiotic intake in the past three months?	Antibiotics given as child?	Were you breastfed?	Acute or chronic diarrhea in the past two months?	History of inflammatory bowel disease?	Diagnosed with a medical condition?	Are you pregnant?	Are you lactating?	Do you have regular menstrual cycles (between 21 and 25 days)?	Do you have history of colon cancer?	Do you exercise regularly?	International travel in the past 6 months?	Do you have children?	Do you have pets?	Are you becoming healthy?	Are you becoming unhealthy?	Diet description	How often do you consume desserts in a week?	Source of drinking water?	Any symptoms at the time of sampling?	How many hours/week do you work?	How do you describe yourself socially?	Monthly income or income of legal guardian/parents?	Education	Health description	How happy have you felt since last one week?	How sressed have you felt since last one week?	Number of doctor visits in the last one year?	Do you have more than 8 molar teeth missing?	Do you have or had blisters or cuts in the last 14 days?	Do you have sores in your mouth?	Are your gums swollen, sore, receding or infected?	Number of dentist visits in the last one year?	How many times you brush your teeth daily?
ISB-33	Yes	Yes	18.1	No	Yes	Yes	No	Yes	Yes	Yes	N/A	No	No	N/A	N/A	No	No	No	No	No	Yes	No	No	No	No	No	No	Yes	No beef and no goat but consume chicken / fish	between 2-4 times a week	filtered	None of these	40-60	Social only with close friends	Between 60,000 and 120,000 PKR	Masters	Good	Moderately	Extremely	N/A	No	No	No	No	Yes	Twice a day
ISB-38	Yes	Yes	18.2	Yes	Yes	Yes	Yes	Yes	Yes	Yes	No	Yes	No	Yes	NO	Yes	No	No	N/A	N/A	N/A	No	Yes	No	No	Yes	No	Yes	All kinds of meat and vegetables	Once a week	Tap	None of these	more than 60	Sometimes social sometimes friendly	Between 20,000 and 60,000 PKR	Bachelor degree	Good	Extremely	Not at all	0-3	No	No	No	No	No	Twice a day
ISB-24	Yes	Yes	18.5	No	Yes	Yes	Yes	Yes	Yes	Yes	No	No	Yes	Yes	NO	No	No	Malaria	N/A	N/A	N/A	No	No	No	No	No	No	No	All kinds of meat and vegetables	between 2-4 times a week	filtered	None of these	more than 60	Very social and friendly	Between 20,000 and 60,000 PKR	Intermediate	Good	Moderately	Slightly	0-3	No	No	No	No	No	Ocassionally
ISB-09	Yes	Yes	18.7	No	Yes	Yes	Yes	Yes	Yes	Yes	No	No	No	Yes	Yes	No	No	No	No	No	Yes	No	No	No	No	No	No	Yes	All kinds of meat and vegetables	Once a week	filtered	None of these	40-60	Sometimes social sometimes friendly	Between 60,000 and 120,000 PKR	Intermediate	Poor	Moderately	Not at all	0-3	No	No	No	No	No	Twice a day
ISB-21	Yes	Yes	19.2	No	Yes	Yes	Yes	Yes	Yes	Yes	No	No	No	Yes	Yes	No	No	No	No	No	Yes	No	No	No	No	No	Yes	No	All kinds of meat and vegetables	Once a week	filtered	Constipation	Less than 20	Sometimes social sometimes friendly	Between 60,000 and 120,000 PKR	Bachelor degree	Good	Moderately	Slightly	0-3	No	Yes	No	No	No	Once a day
ISB-31	Yes	Yes	19.5	Yes	Yes	Yes	Yes	Yes	Yes	Yes	Yes	Yes	Yes	Yes	NO	No	No	No	N/A	N/A	N/A	No	Yes	No	No	No	Yes	No	Vegetarian only and no meat	Once a week	Bottled	None of these	Less than 20	Very social and friendly	Between 20,000 and 60,000 PKR	Matriculation	Excellent		Extremely	>3	No	No	No	No	Yes	Twice a day
ISB-36	Yes	Yes	20.1	Yes	Yes	Yes	Yes	Yes	Yes	Yes	No	Yes	No	Yes	NO	Yes	No	No	N/A	N/A	N/A	No	Yes	No	No	Yes	No	Yes	All kinds of meat and vegetables	Once a week	Tap	None of these	more than 60	Sometimes social sometimes friendly	Between 20,000 and 60,000 PKR	Bachelor degree	Good	Extremely	Not at all	0-3	No	No	No	No	No	Twice a day
ISB-07	Yes	Yes	20.6	No	No	Yes	No	Yes	Yes	Yes	No	No	No	Yes	NO	N/A	No	No	No	No	Yes	No	No	No	No	Yes	No	No	No beef and no goat but consume chicken / fish	everyday	filtered	Stomach pain	Less than 20	Social only with close friends	Between 60,000 and 120,000 PKR	Bachelor degree	Good	Extremely	Not at all	0-3	No	No	No	No	No	Twice a day
ISB-29	Yes	Yes	20.9	No	Yes	Yes	Yes	Yes	Yes	Yes	Yes	No	No	Yes	Yes	No	No	No	N/A	N/A	N/A	No	Yes	No	No	No	Yes	No	Vegetarian only and no meat	Once a week	Bottled	None of these	Less than 20	Very social and friendly	> 120,000 PKR	Matriculation	Good	Extremely	Not at all	0-3	No	No	No	No	Yes	Twice a day
ISB-30	Yes	Yes	20.9	No	Yes	Yes	Yes	Yes	Yes	Yes	Yes	No	Yes	Yes	Yes	No	No	No	N/A	N/A	N/A	No	Yes	No	No	Yes	Yes	No	All kinds of meat and vegetables	between 2-4 times a week	Mineral	None of these	Less than 20	Sometimes social sometimes friendly	Between 20,000 and 60,000 PKR	Intermediate	Excellent	Moderately	Extremely	0-3	No	No	No	No	No	Twice a day
ISB-37	Yes	Yes	21	Yes	Yes	Yes	Yes	Yes	Yes	Yes	Yes	Yes	Yes	Yes	Yes	Yes	No	No	N/A	N/A	N/A	No	Yes	No	No	Yes	No	Yes	All kinds of meat and vegetables	Once a week	Tap	None of these	20-40	Sometimes social sometimes friendly	Between 60,000 and 120,000 PKR	Bachelor degree	Good	Extremely	Not at all	0-3	No	No	No	No	No	Once a day
ISB-13	Yes	No	21.1	No	Yes	Yes	Yes	Yes	Yes	Yes	No	No	No	No	Yes	No	No	No	No	No	Yes	No	No	No	No	No	Yes	No	All kinds of meat and vegetables	Rarely	filtered	None of these	20-40	Very social and friendly	> 120,000 PKR	Intermediate	Good	Extremely	Moderately	0-3	N/A	N/A	N/A	N/A	N/A	N/A
ISB-20	Yes	Yes	21.4	No	No	Yes	Yes	Yes	Yes	Yes	No	No	Yes	Yes	NO	No	No	Rhemautid arthiritis and Hepatitis A	No	No	Yes	No	No	No	No	No	No	Yes	All kinds of meat and vegetables	Rarely	filtered	None of these	20-40	Sometimes social sometimes friendly	Between 60,000 and 120,000 PKR	Bachelor degree	Moderately healthy	Moderately	Moderately	0-3	No	Yes	No	No	No	Once a day
ISB-12	Yes	Yes	21.5	Yes	Yes	Yes	Yes	Yes	Yes	Yes	Yes	No	No	Yes	Yes	No	No	No	No	No	Yes	No	No	No	No	No	No	Yes	All kinds of meat and vegetables	between 2-4 times a week	Tap	None of these	Less than 20	Social only with close friends	Between 60,000 and 120,000 PKR	Masters	Good	Moderately	Extremely	0-3	No	Yes	Yes	No	No	Once a day
ISB-19	Yes	Yes	21.6	Yes	No	Yes	No	Yes	Yes	Yes	No	No	No	Yes	Yes	No	No	Unnamed medical condition	No	No	Yes	No	No	No	No	No	No	No	All kinds of meat and vegetables	Once a week	Bottled	None of these	Less than 20	Sometimes social sometimes friendly	< 20,000 PKR	Bachelor degree	Good	Extremely	Extremely	0-3	No	No	No	No	No	Twice a day
ISB-14	Yes	Yes	21.9	No	No	Yes	Yes	Yes	Yes	Yes	No	No	No	Yes	Yes	No	No	No	No	No	Yes	No	No	UAE	No	No	No	Yes	All kinds of meat and vegetables	Rarely	filtered	None of these	20-40	Social only with close friends	Between 60,000 and 120,000 PKR	Bachelor degree	Good	Moderately	Moderately	0-3	No	No	No	No	No	Once a day
ISB-18	Yes	Yes	22.3	No	Yes	Yes	Yes	Yes	Yes	Yes	No	No	No	Yes	Yes	No	No	No	No	No	Yes	No	No	No	No	No	Yes	No	All kinds of meat and vegetables	Rarely	filtered	None of these	Less than 20	Sometimes social sometimes friendly	Between 20,000 and 60,000 PKR	Bachelor degree	Good	Moderately	Moderately	0-3	No	No	No	No	No	Once a day
ISB-04	Yes	Yes	22.4	No	Yes	Yes	No	Yes	Yes	Yes	No	No	No	Yes	Yes	No	No	No	N/A	N/A	N/A	No	No	No	No	No	Yes	No	All kinds of meat and vegetables	between 2-4 times a week	Tap	None of these	Less than 20	Sometimes social sometimes friendly	Between 20,000 and 60,000 PKR	Masters	Excellent	Moderately	Not at all	0-3	No	No	No	No	No	Once a day
ISB-11	Yes	Yes	23	Yes	Yes	Yes	Yes	Yes	Yes	Yes	Yes	Yes	No	Yes	Yes	No	No	No	N/A	N/A	N/A	No	No	No	No	Yes	Yes	No	All kinds of meat and vegetables	between 2-4 times a week	Mineral	None of these	20-40	Sometimes social sometimes friendly	Between 60,000 and 120,000 PKR	Masters	Good	Moderately	Slightly	0-3	No	No	No	No	No	Twice a day
ISB-10	Yes	Yes	23.5	Yes	Yes	Yes	No	No	Yes	Yes	No	No	No	Yes	Yes	No	No	No	No	No	Yes	No	Yes	No	No	Yes	Yes	No	All kinds of meat and vegetables	Rarely	filtered	None of these	40-60	Shy and introvert	Between 20,000 and 60,000 PKR	Masters	Good	Moderately	Slightly	0-3	No	No	No	No	Yes	Once a day
ISB-27	Yes	Yes	23.5	No	No	Yes	No	Yes	Yes	Yes	No	Yes	No	No	NO	No	No	No	N/A	N/A	N/A	No	No	No	No	No	No	No	Eat vegetables and meat but no dairy products	between 2-4 times a week	filtered	None of these	20-40	Very social and friendly	< 20,000 PKR	Did not go to school	Good	Moderately	Moderately	>3	No	No	No	No	No	Once a day
ISB-28	Yes	Yes	23.8	Yes	Yes	Yes	Yes	Yes	No	Yes	Yes	No	No	No	NO	No	No	No	No	No	Yes	No	No	No	No	No	Yes	No	All kinds of meat and vegetables	Rarely	filtered	None of these	40-60	Very social and friendly	Between 20,000 and 60,000 PKR	Bachelor degree	Good	Extremely	Slightly	0-3	No	No	No	No	No	Once a day
ISB-34	Yes	Yes	23.9	No	Yes	Yes	Yes	Yes	Yes	Yes	Yes	No	No	No	N/A	No	No	No	No	No	Yes	No	No	No	Yes	No	Yes	No	No beef and no goat but consume chicken / fish	Once a week	Mineral	None of these	Less than 20	Social only with close friends	Between 20,000 and 60,000 PKR	Intermediate	Moderately healthy	Extremely	Moderately	0-3	No	No	No	No	No	Once a day
ISB-05	Yes	Yes	24	No	No	Yes	Yes	Yes	Yes	Yes	No	Yes	No	Yes	Yes	No	No	No	N/A	N/A	N/A	No	No	No	No	No	Yes	No	All kinds of meat and vegetables	between 2-4 times a week	Tap	None of these	Less than 20	Sometimes social sometimes friendly	Between 60,000 and 120,000 PKR	Masters	Excellent	Moderately	Not at all	N/A	No	No	No	No	No	Once a day
ISB-40	Yes	No	24.1	No	Yes	Yes	Yes	Yes	Yes	Yes	No	No	No	Yes	Yes	No	No	No	N/A	N/A	N/A	No	Yes	No	No	No	Yes	No	All kinds of meat and vegetables	Rarely	filtered	None of these	20-40	Social only with close friends	< 20,000 PKR	Matriculation	Good	Extremely	Slightly	0-3	N/A	N/A	N/A	N/A	N/A	N/A
ISB-06	Yes	Yes	24.2	No	Yes	Yes	Yes	Yes	Yes	Yes	No	No	Yes	Yes	Yes	No	No	No	No	No	Yes	No	No	No	No	No	No	No	All kinds of meat and vegetables	everyday	Mineral	Stomach pain	Less than 20	Sometimes social sometimes friendly	< 20,000 PKR	Masters	Moderately healthy	Moderately	Slightly	0-3	No	No	No	No	No	Once a day
ISB-15	Yes	Yes	24.2	No	Yes	Yes	Yes	Yes	Yes	Yes	No	No	No	Yes	Yes	No	No	No	No	No	Yes	No	No	No	No	No	Yes	No	Vegetarian only and no meat	Rarely	filtered	None of these	40-60	Very social and friendly	Between 20,000 and 60,000 PKR	Masters	Good	Moderately	Moderately	0-3	No	No	No	No	No	Once a day
ISB-17	Yes	No	24.2	No	Yes	Yes	No	Yes	N/A	Yes	No	No	No	No	Yes	Yes	No	No	No	No	Yes	No	No	No	No	No	Yes	No	All kinds of meat and vegetables	Rarely	filtered	None of these	more than 60	Social only with close friends	< 20,000 PKR	Intermediate	Excellent	Slightly	Moderately	0-3	N/A	N/A	N/A	N/A	N/A	N/A
ISB-01	Yes	Yes	24.6	No	Yes	Yes	No	Yes	Yes	Yes	No	No	No	Yes	Yes	No	Yes	Tuberculosis	No	No	Yes	No	No	No	No	No	Yes	No	No beef and no goat but consume chicken / fish	Rarely	Tap	None of these	40-60	Sometimes social sometimes friendly	Between 60,000 and 120,000 PKR	Masters	Good	Moderately	Slightly	0-3	No	No	No	No	Yes	Once a day
ISB-32	Yes	Yes	24.7	No	Yes	Yes	Yes	Yes	Yes	Yes	No	Yes	No	Yes	NO	No	No	No	N/A	N/A	N/A	No	No	No	No	No	No	No	All kinds of meat and vegetables	Once a week	Tap	None of these	Less than 20	Social only with close friends	> 120,000 PKR	Intermediate	Good	Extremely	Not at all	0-3	No	No	No	No	No	Once a day
ISB-39	Yes	Yes	24.8	No	Yes	Yes	Yes	Yes	Yes	Yes	Yes	No	No	Yes	Yes	No	No	No	N/A	N/A	N/A	No	Yes	No	No	No	Yes	No	All kinds of meat and vegetables	Rarely	filtered	None of these	20-40	Social only with close friends	< 20,000 PKR	Matriculation	Good	Extremely	Slightly	0-3	No	No	No	No	No	Twice a day
ISB-35	Yes	Yes	24.9	Yes	No	Yes	Yes	Yes	Yes	Yes	Yes	No	No	Yes	N/A	No	No	Chronic liver disease	N/A	N/A	N/A	No	No	No	Yes	No	Yes	No	All kinds of meat and vegetables	Once a week	Mineral	None of these	20-40	Sometimes social sometimes friendly	Between 20,000 and 60,000 PKR	Bachelor degree	Good	Moderately	Moderately	>3	No	No	No	No	No	Once a day
