# Supplementary material for: Initial Sequencing and Characterization of the Gastrointestinal and Oral Microbiota in Urban Pakistani Adults
Source: Front Cell Infect Microbiol. 2020 Aug 7;10:409. doi: 10.3389/fcimb.2020.00409 (PMC7428047; doi:10.3389/fcimb.2020.00409)
Supplement: Supplementary file 2 [file Table_2.XLSX]

## Sheet: Sheet1
Bodysite	Taxonomy level	Organism	Mean relative abundance (all samples)			Mean relative abundance (males)			Mean relative abundance (females)			uBiome
			min	mean	max	min	mean	max	min	mean	max
Gut	Phylum	Firmicutes	21.8	46.62	76.36	23.73	40.14	58.14	21.8	51.96	76.36	60.1
Gut	Phylum	Bacteroidetes	11.79	24.5	51.45	13	21.18	31.06	11.79	27.24	51.45	31.06
Gut	Phylum	Proteobacteria	2.07	15.87	41.85	5.53	25.07	41.85	2.07	8.29	18.53	3.83
Gut	Phylum	Actinobacteria	0.68	8.59	37.25	0.68	9.31	37.25	1.69	8	16.12	4.1
Gut	Genus	Faecalibacterium	1.62	8.89	21.2	2.39	7.31	12.77	1.62	10.19	21.2	13.11
Gut	Genus	Bacteroides	0.28	7.91	42.25	0.28	3.76	13.5	0.28	11.33	42.25	22.71
Gut	Genus	Blautia	0.48	4.85	15.55	1.49	3.86	10.86	0.48	5.66	15.55	11.43
Gut	Genus	Bifidobacterium	0.03	4.21	11.27	0.03	3.69	10.62	0.38	4.65	11.27	2.08
Gut	Genus	Pseudobutyrivibrio	0.38	3.82	10.41	0.38	3.29	10.12	0.52	4.26	10.41	2.64
Gut	Genus	Sarcina	0.25	3.64	11.49	0.25	2.82	6.58	0.27	4.31	11.49	2.1
Gut	Genus	Roseburia	0.48	3.46	8.54	0.48	2.85	5.03	1.05	3.96	8.54	7.75
Gut	Genus	Sutterella	0.13	3.15	9.98	0.13	2.49	7.41	0.21	3.69	9.98	1.21
Gut	Genus	Collinsella	0.25	2.06	6.39	0.25	1.61	6.06	0.63	2.43	6.39	1.88
Gut	Genus	Subdoligranulum	0.28	2	4.1	0.28	1.53	3.77	0.34	2.38	4.1	2.93
Gut	Genus	Dorea	0.35	1.95	5.06	0.35	1.61	5.06	0.38	2.23	5.01	1.46
Gut	Genus	Alistipes	0.06	0.92	6.81	0.06	0.49	1.91	0.08	1.28	6.81	1.88
Gut	Genus	Clostridium	0.12	0.81	3.15	0.12	0.42	1	0.13	1.14	3.15	0.82
Gut	Genus	Fusicatenibacter	0.03	0.77	2.41	0.1	0.64	2.32	0.03	0.88	2.41	2.65
Gut	Genus	Intestinibacter	0.13	0.68	3.34	0.13	0.4	0.9	0.17	0.92	3.34	0.86
Gut	Genus	Lachnospira	0.06	0.41	1.37	0.06	0.22	0.55	0.1	0.56	1.37	N/A
Gut	Genus	Intestinimonas	0.01	0.2	0.81	0.01	0.14	0.25	0.04	0.25	0.81	N/A
Oral	Phylum	Proteobacteria	8.28	34.66	74.85	8.28	33.89	51.32	24.88	35.33	74.85	23.18
Oral	Phylum	Firmicutes	15.03	31.25	62.43	15.03	25.43	42.99	16.1	36.29	62.43	57.36
Oral	Phylum	Bacteroidetes	4.13	15.43	31.1	5.12	16.95	31.1	4.13	14.12	21.61	10.93
Oral	Phylum	Actinobacteria	2.07	10.23	37.96	4.71	13.37	37.96	2.07	7.51	15.26	5.57
Oral	Phylum	Fusobacteria	0.64	7.27	16.77	2.29	9.42	16.77	0.64	5.4	10.68	3.19
Oral	Genus	Haemophilus	1	16.17	56.21	1	8.25	16.83	8.33	23.04	56.21	13.01
Oral	Genus	Streptococcus	6.74	15.58	37.66	6.74	10.18	17.28	9.68	20.26	37.66	35.18
Oral	Genus	Neisseria	0.01	11.09	35.67	0.12	16.51	35.67	0.01	6.39	21.31	7.12
Oral	Genus	Veillonella	1.18	7.29	21.22	2.21	7.48	18.26	1.18	7.13	21.22	9.23
Oral	Genus	Leptotrichia	0.72	5.63	16.54	2.48	7.62	16.54	0.72	3.9	10.8	1.83
Oral	Genus	Capnocytophaga	0.46	4.42	11.41	0.46	4.82	11.41	1	4.06	8.9	0.99
Oral	Genus	Prevotella	0.48	4.16	23.74	1.03	5.62	23.74	0.48	2.89	8.55	5.09
Oral	Genus	Actinomyces	0.43	4.03	14.27	1.02	5.4	14.27	0.43	2.84	4.79	2.06
Oral	Genus	Porphyromonas	0.02	3.59	10.64	0.16	3.26	7.71	0.02	3.88	10.64	1.73
Oral	Genus	Gemella	0.28	3.42	18.18	0.73	1.76	4.24	0.28	4.86	18.18	6.91
Oral	Genus	Corynebacterium	0.16	2.77	11.55	0.16	3.34	11.55	0.16	2.28	5.26	1.34
Oral	Genus	Lautropia	0.03	2.65	14.28	0.03	3.4	10.47	0.03	2.01	14.28	1.21
Oral	Genus	Aggregatibacter	0.04	2.57	10.7	0.08	2.5	7.29	0.04	2.62	10.7	0.94
Oral	Genus	Centipeda	0.03	1.42	5.72	0.09	2.24	5.72	0.03	0.72	2.54	0.57
Oral	Genus	Granulicatella	0.02	1.03	3.86	0.02	0.46	1.97	0.16	1.51	3.86	2
Oral	Genus	Trichococcus	0.04	0.92	3.21	0.04	0.55	1.18	0.24	1.24	3.21	N/A
Oral	Genus	Bergeyella	0.07	0.86	3.7	0.07	0.6	2.17	0.12	1.09	3.7	0.52
Oral	Genus	Abiotrophia	0.01	0.64	3.09	0.01	0.55	1.57	0.04	0.73	3.09	0.78
