# Supplementary material for: Initial Sequencing and Characterization of the Gastrointestinal and Oral Microbiota in Urban Pakistani Adults
Source: Front Cell Infect Microbiol. 2020 Aug 7;10:409. doi: 10.3389/fcimb.2020.00409 (PMC7428047; doi:10.3389/fcimb.2020.00409)
Supplement: Supplementary file 6 [file Table_6.XLSX]

## Sheet: LEFSE_output_gender
Genus	P-value	FDR	Female	Male	LDA score
Succinivibrio	2.1128e-05	0.0019015	294689	2.34621e+06	6.01
Lachnospira	0.00073717	0.033173	56116.6	22038	-4.23
Phascolarctobacterium	0.0011679	0.035037	2021.43	51439.7	4.39
Elusimicrobium	0.0016788	0.037774	3339.75	135109	4.82
Thalassospira	0.0098412	0.16059	9184.31	73744.4	4.51
Parabacteroides	0.012306	0.16059	64334.1	14834.3	-4.39
Alistipes	0.013825	0.16059	127701	48985.1	-4.6
Subdoligranulum	0.014629	0.16059	238353	152772	-4.63
Peptoclostridium	0.016059	0.16059	8656.98	4215.49	-3.35
Clostridium	0.024886	0.22397	113859	41941.5	-4.56
Olsenella	0.030914	0.25293	83669.5	25933.3	-4.46
Haemophilus	0.037614	0.25757	13402.9	4162.13	-3.66
Senegalimassilia	0.040644	0.25757	21093.2	8591.07	-3.8
Oscillibacter	0.042217	0.25757	12480.1	4642.38	-3.59
Collinsella	0.042929	0.25757	242879	160776	-4.61
Actinomyces	0.046376	0.26087	2153.26	1120.57	-2.71
Romboutsia	0.05365	0.28403	35726.5	10458.7	-4.1
Varibaculum	0.066421	0.31728	571.273	8644.43	3.61
Bilophila	0.067057	0.31728	26410.4	10618.8	-3.9
Intestinibacter	0.070848	0.31728	91579.4	40127.2	-4.41
Dorea	0.074031	0.31728	223412	161416	-4.49
Faecalibacterium	0.080716	0.3302	1.01933e+06	730561	-5.16
Terrisporobacter	0.095416	0.37131	33793	16328.4	-3.94
Intestinimonas	0.099017	0.37131	25136	13980.5	-3.75
Lactobacillus	0.10333	0.37197	78703.8	12539.8	-4.52
Moryella	0.11787	0.40803	49085.5	3255	-4.36
Mitsuokella	0.12703	0.42254	236463	204958	-4.2
Sutterella	0.13146	0.42254	368779	249301	-4.78
Bacteroides	0.14192	0.42938	1.13332e+06	375552	-5.58
Turicibacter	0.14313	0.42938	11513.3	2561.31	-3.65
Sarcina	0.16474	0.47828	431443	281958	-4.87
Streptococcus	0.19689	0.55376	31595.8	116967	4.63
Blautia	0.20401	0.55639	566175	385958	-4.95
Butyricimonas	0.23552	0.62103	8832.76	28868.1	4
Fusicatenibacter	0.24151	0.62103	87536.6	64192.9	-4.07
Roseburia	0.26638	0.63179	395672	285106	-4.74
Phyllobacterium	0.27643	0.63179	307.608	106.721	-2.01
Desulfovibrio	0.27844	0.63179	48470.3	16541.8	-4.2
Robinsoniella	0.28222	0.63179	5185.4	586.967	-3.36
Anaerotruncus	0.2834	0.63179	29618.3	16862	-3.8
Solobacterium	0.29515	0.63179	2812.42	907.131	-2.98
Marvinbryantia	0.30132	0.63179	10195	7630.57	-3.11
Alloprevotella	0.30185	0.63179	742083	967429	5.05
Megasphaera	0.31788	0.65022	294645	408743	4.76
Trichococcus	0.32562	0.65123	571.273	373.525	-2
Papillibacter	0.35201	0.68872	2065.37	320.164	-2.94
Bifidobacterium	0.36126	0.69132	465060	368562	-4.68
Anaerococcus	0.37771	0.69132	1274.38	59443.8	4.46
Pseudobutyrivibrio	0.38251	0.69132	425906	328542	-4.69
Finegoldia	0.39	0.69132	5932.45	20864	3.87
Catenibacterium	0.39175	0.69132	165449	187296	4.04
Enterorhabdus	0.4092	0.69218	5756.67	2721.39	-3.18
Butyrivibrio	0.41362	0.69218	29750.1	47491	3.95
Weissella	0.41531	0.69218	2988.2	10512	3.58
Corynebacterium	0.4606	0.74534	7865.99	356396	5.24
Megamonas	0.47011	0.74534	343071	102132	-5.08
Sporobacter	0.4781	0.74534	1581.99	1600.82	1.02
Odoribacter	0.50264	0.74534	11117.8	12539.8	2.85
Howardella	0.50542	0.74534	2768.48	1600.82	-2.77
Propionibacterium	0.51187	0.74534	2372.98	11952.8	3.68
Enterococcus	0.51463	0.74534	6987.11	3255	-3.27
Veillonella	0.5286	0.74534	2548.76	5496.15	3.17
Mobiluncus	0.53401	0.74534	615.217	2934.84	3.06
Peptococcus	0.53533	0.74534	4350.46	7417.13	3.19
Dialister	0.5383	0.74534	279089	250582	-4.15
Flavonifractor	0.5919	0.79163	42889.4	40287.3	-3.11
Pantoea	0.59201	0.79163	133238	95568.9	-4.27
Peptoniphilus	0.59812	0.79163	4965.68	45516.6	4.31
Fretibacterium	0.61546	0.80277	2504.81	2294.51	-2.03
Flavobacterium	0.64784	0.83294	70486.3	41034.3	-4.17
Erysipelatoclostridium	0.66398	0.84166	7162.88	4855.82	-3.06
Paraprevotella	0.69574	0.86525	24696.6	3041.56	-4.03
Peptostreptococcus	0.70181	0.86525	615.217	693.689	1.6
Barnesiella	0.7277	0.87564	6503.72	4162.13	-3.07
Anaerostipes	0.73569	0.87564	41571.1	34471	-3.55
Mogibacterium	0.74846	0.87564	3295.81	5069.26	2.95
Slackia	0.74916	0.87564	7514.44	4322.21	-3.2
Victivallis	0.7606	0.87761	77297.6	30042	-4.37
Asteroleplasma	0.79298	0.9034	348345	125344	-5.05
Campylobacter	0.81647	0.91229	10063.2	72303.7	4.49
Murdochiella	0.82106	0.91229	3471.58	18836.3	3.89
Anaeroplasma	0.84942	0.9176	1054.66	1440.74	2.29
Methanobrevibacter	0.85643	0.9176	11425.5	6723.44	-3.37
Porphyromonas	0.85643	0.9176	9316.14	91566.9	4.61
Prevotella	0.90303	0.95614	106784	50052.3	-4.45
Fibrobacter	0.91768	0.96036	2241.15	213.443	-3.01
Candidatus_Soleaferrea	0.94587	0.97848	3691.3	6349.92	3.12
Gemella	0.96048	0.98231	527.329	693.689	1.93
Allisonella	0.98409	0.99514	5800.62	4482.29	-2.82
Enterobacter	1	1	25092.1	9925.08	-3.88
