# Supplementary material for: Initial Sequencing and Characterization of the Gastrointestinal and Oral Microbiota in Urban Pakistani Adults
Source: Front Cell Infect Microbiol. 2020 Aug 7;10:409. doi: 10.3389/fcimb.2020.00409 (PMC7428047; doi:10.3389/fcimb.2020.00409)
Supplement: Supplementary file 10 [file Table_10.XLSX]

## Sheet: corr_kendall_oral_genera
	Abiotrophia	Actinobacillus	Actinomyces	Aggregatibacter	Alloprevotella	Anaeroglobus	Atopobium	Bergeyella	Campylobacter	Candidatus_Sacchar	Capnocytophaga	Cardiobacterium	Catonella	Centipeda	Comamonas	Corynebacterium	Delftia	Dialister	Eikenella	Filifactor	Fretibacterium	Fusobacterium	Gemella	Granulicatella	Haemophilus	Johnsonella	Kingella	Lachnoanaerobaculu	Lactobacillus	Lautropia	Leptotrichia	Megasphaera	Mogibacterium	Moraxella	Mycobacterium	Mycoplasma	Neisseria	Olsenella	Oribacterium	Parvimonas	Peptoclostridium	Peptococcus	Peptostreptococcus	Porphyromonas	Prevotella	Propionibacterium	Rothia	Sarcina	Selenomonas
Abiotrophia	1	-0.21317	-0.34574	0.24403	0.10106	-0.138	-0.28096	0.18617	-0.11141	-0.18191	0.313	0.016043	-0.043489	-0.095491	0.020842	-0.22045	0.025876	0.02611	0.076965	-0.030026	-0.16078	0.061252	0.047746	0.12202	0.11141	0.1555	-0.09731	-0.053334	-0.16328	0.23108	-0.015915	-0.32538	-0.21266	0.45631	-0.1983	-0.057771	-0.063661	-0.16814	-0.28651	-0.064613	0.052601	-0.089231	-0.083225	0.39575	-0.27357	0.24234	-0.03183	0.33199	-0.13744
Actinobacillus	-0.21317	1	0.069212	-0.27335	-0.1052	-0.13168	0.090454	0	-0.11321	-0.033062	-0.29544	0.0027833	0.014147	-0.16291	-0.13017	-0.027648	0.098762	0.057378	-0.28327	-0.018753	-0.043391	-0.011089	0.19052	0.12977	0.14634	-0.047444	-0.12662	-0.04719	-0.24929	-0.077415	-0.1353	-0.018817	0.0096245	-0.32287	0.080774	-0.13907	-0.1353	0.22504	-0.12526	0.093577	-0.095101	0.17978	0.025152	-0.14377	0.077415	-0.033266	0.11321	-0.10966	-0.11731
Actinomyces	-0.34574	0.069212	1	-0.22281	-0.16489	0.161	0.19117	-0.44681	0.32361	0.13571	-0.18037	-0.13369	0.059797	0.36605	0.13399	0.16733	0.051751	-0.017407	0.15118	-0.054046	0.14887	0.13582	-0.22812	-0.37666	-0.37135	0.14478	0.23787	0.496	0.058056	-0.16733	0.38196	0.28923	0.27429	-0.13719	0.22417	-0.021664	0.1008	0.21919	0.36673	0.025283	0.024916	0.36556	0.051009	-0.40637	0.32669	0.029294	0.17507	-0.26814	0.2254
Aggregatibacter	0.24403	-0.27335	-0.22281	1	0.2122	0.057346	-0.083777	0.35544	0.15344	0.29662	0.34921	0.14934	0.14639	0.20106	0.22569	0.1404	-0.17635	0.28355	0.28511	0.14674	0.035635	-0.0079682	0.05291	0.026455	-0.068783	-0.058827	0.043134	-0.042554	0.16647	0.066225	0.058201	-0.21334	-0.098361	0.1398	0.26944	0.12964	0.074074	0.080855	-0.10858	0.1485	0.21261	-0.11196	0.029453	0.47417	-0.082119	0.31607	-0.021164	0.27698	0.087727
Alloprevotella	0.10106	-0.1052	-0.16489	0.2122	1	0.24916	0.072413	0.047872	0.095491	0.17036	0.090186	-0.096258	0.42945	0.058356	0.13101	-0.098274	-0.33207	0.31912	0.18142	0.27924	0.26797	0.21039	0.079576	0.084881	-0.16976	0.25738	0.048655	0.069334	0.21045	0.18858	0.12732	-0.17173	0.03082	0.26544	0.01437	0.072214	0.15385	0.15013	0.12893	0.3343	0.34606	0.083474	0.27115	0.23639	0.24701	0.093209	-0.32891	0.42456	0.10445
Anaeroglobus	-0.138	-0.13168	0.161	0.057346	0.24916	1	0.08767	-0.24149	0.27909	0.12069	-0.0038231	-0.11561	0.27423	0.3479	0.15449	0.1493	-0.29836	0.17562	0.13074	0.30293	0.3991	0.1305	-0.1491	-0.14145	-0.37084	0.26663	0.21428	0.3805	0.20919	-0.022969	0.29438	0.0086847	0.27985	0.23642	0.37694	0.041633	0.15675	0.46738	0.34274	0.26723	0.19153	0.28211	0.22056	-0.0038282	0.47086	0.22262	-0.0497	-0.10582	0.3526
Atopobium	-0.28096	0.090454	0.19117	-0.083777	0.072413	0.08767	1	-0.12455	0.054888	0.29874	-0.22822	-0.096098	0.15985	0.20511	0.0064854	-0.011571	0.070452	0.11374	-0.13771	0.11445	0.334	0.32194	0.031777	0.020222	-0.16466	0.046719	-0.017663	0.049372	0.25687	-0.28927	0.031777	0.46922	0.40278	-0.24036	0.07825	0.27527	-0.11267	0.25834	0.36508	0.085667	0.0090454	0.21317	0.017543	-0.23431	0.28059	-0.098613	-0.066443	-0.041719	0.34427
Bergeyella	0.18617	0	-0.44681	0.35544	0.047872	-0.24149	-0.12455	1	-0.11671	0.12705	0.23342	0.28343	0.057079	-0.14324	-0.056572	-0.018592	-0.21132	0.22629	0.038482	0.25522	0.083369	-0.045273	0.3183	0.29178	0.28117	-0.13941	-0.22706	-0.38933	0.0036285	-0.037185	-0.19629	-0.18077	-0.055475	-0.044736	0.13795	0.24192	-0.063661	-0.051044	-0.28651	0.20508	0.094128	-0.30799	0.099333	0.43825	-0.1992	-0.039947	-0.13263	0.2873	-0.06597
Campylobacter	-0.11141	-0.11321	0.32361	0.15344	0.095491	0.27909	0.054888	-0.11671	1	0.29086	0.25397	0.069336	0.35241	0.6455	0.44544	0.29404	-0.15914	0.1736	0.46605	0.23059	0.3029	0.045153	-0.33862	-0.37566	-0.56614	0.34227	0.523	0.4149	0.30399	0.16159	0.64021	0.075121	0.13525	0.038669	0.34969	0.20887	0.16931	0.15872	0.017145	0.17091	0.22365	0.20383	-0.013388	-0.029139	0.18278	0.35326	0	0.047756	0.36736
Candidatus_Sacchar	-0.18191	-0.033062	0.13571	0.29662	0.17036	0.12069	0.29874	0.12705	0.29086	1	0.037437	0.046447	0.29509	0.37149	0.28446	0.22492	-0.19196	0.41575	0.13429	0.13365	0.25537	0.1995	-0.043197	-0.18719	-0.31966	0.11352	0.055758	0.092644	0.35061	-0.023069	0.2275	0.11121	0.34129	-0.1198	0.42434	0.2548	0.043197	0.29012	0.14619	0.30194	0.12924	0.2125	0.10201	0.0057672	0.24222	0.12143	-0.12383	0.24606	0.39989
Capnocytophaga	0.313	-0.29544	-0.18037	0.34921	0.090186	-0.0038231	-0.22822	0.23342	0.25397	0.037437	1	0.40535	0.086747	0.19577	0.30884	0.23046	-0.24517	-0.052081	0.30704	0.1108	0.11284	0.055777	-0.12169	-0.05291	-0.19048	0.048131	0.1995	-0.026596	0.20266	0.23046	0.26455	-0.21935	-0.30738	0.31233	0.091723	0.14405	0.1746	-0.15273	-0.27432	-0.036424	0.12977	-0.23828	-0.25972	0.37881	-0.27815	0.20452	0.015873	0.18147	0.087727
Cardiobacterium	0.016043	0.0027833	-0.13369	0.14934	-0.096258	-0.11561	-0.096098	0.28343	0.069336	0.046447	0.40535	1	0.060117	0.080003	0.17063	0.25902	-0.043357	0.023333	-0.022108	0.099617	0.14069	-0.06158	0.064002	0.069336	0.010667	0.091645	-0.01087	-0.069705	0.14592	0.10414	0.144	-0.12116	-0.1983	0.014992	0.037562	0.090751	-0.18667	-0.0060374	-0.34853	0.16663	0.12525	-0.078134	-0.24562	0.21095	-0.28572	0.13119	0.058669	0.083441	0.041452
Catonella	-0.043489	0.014147	0.059797	0.14639	0.42945	0.27423	0.15985	0.057079	0.35241	0.29509	0.086747	0.060117	1	0.27651	0.18257	0.07329	-0.33496	0.41508	0.31182	0.50938	0.39558	0.20957	0.03253	-0.13554	-0.36867	0.40552	0.16575	0.22075	0.14091	0.17101	0.33072	-0.021553	0.19843	0.20117	0.064617	0.35425	0.13012	0.055234	0.055633	0.5053	0.59416	0.23828	0.27986	0.16015	0.42888	0.26944	-0.16265	0.34907	0.14608
Centipeda	-0.095491	-0.16291	0.36605	0.20106	0.058356	0.3479	0.20511	-0.14324	0.6455	0.37149	0.19577	0.080003	0.27651	1	0.46919	0.36291	-0.055915	0.15046	0.34542	0.14075	0.32665	0.12483	-0.3545	-0.34921	-0.60317	0.43318	0.47987	0.52128	0.36189	0.082119	0.65608	0.20132	0.19058	0.09221	0.34396	0.18006	0.037037	0.21861	0.10858	0.17651	0.2347	0.27847	-0.045519	-0.11921	0.23046	0.34794	-0.015873	0.060491	0.54281
Comamonas	0.020842	-0.13017	0.13399	0.22569	0.13101	0.15449	0.0064854	-0.056572	0.44544	0.28446	0.30884	0.17063	0.18257	0.46919	1	0.44008	-0.077249	0.12017	0.36312	0.063868	0.096667	0.24448	-0.32071	-0.26132	-0.39792	0.21311	0.43274	0.20898	0.41028	0.32114	0.49295	-0.016865	-0.024152	-0.080134	0.19305	0.12531	0.19005	0.040338	-0.10264	0.072336	0.0061988	-0.083784	-0.22842	0.098126	-0.0029735	0.17292	0.011878	0.17154	0.25541
Corynebacterium	-0.22045	-0.027648	0.16733	0.1404	-0.098274	0.1493	-0.011571	-0.018592	0.29404	0.22492	0.23046	0.25902	0.07329	0.36291	0.44008	1	0.047376	-0.072431	0.22235	0.089958	0.062444	-0.010638	-0.18278	-0.19338	-0.36821	0.080325	0.43461	0.26898	0.20293	0.19629	0.31523	0.16248	-0.19391	-0.12807	0.30136	0.19472	0.098013	0.11994	-0.13448	0.028055	-0.06912	0.040244	-0.25203	-0.04244	0.005305	0.14894	0.29934	-0.066947	0.1949
Delftia	0.025876	0.098762	0.051751	-0.17635	-0.33207	-0.29836	0.070452	-0.21132	-0.15914	-0.19196	-0.24517	-0.043357	-0.33496	-0.055915	-0.077249	0.047376	1	-0.21169	-0.27189	-0.39437	-0.36693	-0.13819	-0.31399	-0.14194	0.090324	-0.073906	0.074513	0.060537	-0.20593	0.10767	-0.17635	0.27358	-0.1999	-0.28533	-0.22369	-0.16979	-0.26237	-0.0097376	-0.08827	-0.35531	-0.18406	0.074679	-0.24378	-0.40054	-0.28856	0	0.012903	-0.16046	0.075772
Dialister	0.02611	0.057378	-0.017407	0.28355	0.31912	0.17562	0.11374	0.22629	0.1736	0.41575	-0.052081	0.023333	0.41508	0.15046	0.12017	-0.072431	-0.21169	1	0.0059967	0.47819	0.40598	0.12491	0.23147	0.063655	0.052081	0.20472	-0.15038	-0.037815	0.2929	-0.17673	0.023147	-0.095306	0.32274	-0.032533	0.3856	0.29933	-0.20254	0.41923	0.13439	0.67416	0.45298	0.32968	0.21964	0.2144	0.27524	0.14234	-0.26619	0.29598	0.20089
Eikenella	0.076965	-0.28327	0.15118	0.28511	0.18142	0.13074	-0.13771	0.038482	0.46605	0.13429	0.30704	-0.022108	0.31182	0.34542	0.36312	0.22235	-0.27189	0.0059967	1	0.20792	0.14771	0.082572	-0.21932	-0.26866	-0.44412	0.20505	0.38274	0.17363	0.12001	0.30471	0.43315	-0.031138	0.012741	0.20961	0.18119	0.33586	0.44412	-0.068272	-0.12141	0.031938	0.2146	0.014875	0.099889	0.13451	0.079608	0.24772	0.12062	0.32002	0.13352
Filifactor	-0.030026	-0.018753	-0.054046	0.14674	0.27924	0.30293	0.11445	0.25522	0.23059	0.13365	0.1108	0.099617	0.50938	0.14075	0.063868	0.089958	-0.39437	0.47819	0.20792	1	0.58153	0.021046	0.21861	0.14075	-0.12877	0.26031	0.048827	0.015053	0.29085	-0.11994	0.15273	0.10544	0.32707	0.047139	0.20765	0.59107	0.0029946	0.20678	0.093803	0.5804	0.44383	0.071492	0.24247	0.22789	0.34184	0.11124	-0.026952	0.32795	0.20792
Fretibacterium	-0.16078	-0.043391	0.14887	0.035635	0.26797	0.3991	0.334	0.083369	0.3029	0.25537	0.11284	0.14069	0.39558	0.32665	0.096667	0.062444	-0.36693	0.40598	0.14771	0.58153	1	0.19677	0.029696	-0.065331	-0.25538	0.28814	0.11197	0.12837	0.45903	-0.1576	0.32665	0.20575	0.41059	-0.03005	0.29601	0.56996	-0.017817	0.30589	0.19887	0.57554	0.30994	0.14179	0.17432	0.038656	0.3925	0.080498	-0.14254	0.18941	0.45236
Fusobacterium	0.061252	-0.011089	0.13582	-0.0079682	0.21039	0.1305	0.32194	-0.045273	0.045153	0.1995	0.055777	-0.06158	0.20957	0.12483	0.24448	-0.010638	-0.13819	0.12491	0.082572	0.021046	0.19677	1	-0.0026561	-0.12483	-0.23108	0.11007	-0.062253	0.098798	0.0218	0.053192	0.14608	-0.054303	0.13887	-0.0029864	0.094966	0.10123	0.023905	0.12026	0.18935	0.036569	0.02495	0.060527	-0.059142	-0.026596	0.090426	0.037333	0.029217	0.025571	0.1679
Gemella	0.047746	0.19052	-0.22812	0.05291	0.079576	-0.1491	0.031777	0.3183	-0.33862	-0.043197	-0.12169	0.064002	0.03253	-0.3545	-0.32071	-0.18278	-0.31399	0.23147	-0.21932	0.21861	0.029696	-0.0026561	1	0.57143	0.43386	-0.053479	-0.48526	-0.27128	-0.12304	-0.3894	-0.37037	-0.21334	-0.012295	-0.0089236	0.011465	0.06482	-0.18519	0.098823	0.01143	0.33902	0.1353	0.054545	0.16333	0.36821	0.002649	-0.14077	-0.015873	0.13053	-0.32898
Granulicatella	0.12202	0.12977	-0.37666	0.026455	0.084881	-0.14145	0.020222	0.29178	-0.37566	-0.18719	-0.05291	0.069336	-0.13554	-0.34921	-0.26132	-0.19338	-0.14194	0.063655	-0.26866	0.14075	-0.065331	-0.12483	0.57143	1	0.42857	-0.080218	-0.40438	-0.26064	-0.028951	-0.25695	-0.36508	-0.11118	-0.036886	-0.0089236	-0.063059	-0.021607	-0.22222	0.14674	-0.04572	0.098063	-0.02485	-0.10622	0.061584	0.26755	-0.11921	-0.18327	-0.05291	0.20057	-0.23028
Haemophilus	0.11141	0.14634	-0.37135	-0.068783	-0.16976	-0.37084	-0.16466	0.28117	-0.56614	-0.31966	-0.19048	0.010667	-0.36867	-0.60317	-0.39792	-0.36821	0.090324	0.052081	-0.44412	-0.12877	-0.25538	-0.23108	0.43386	0.42857	1	-0.32622	-0.5284	-0.48937	-0.18095	-0.23576	-0.69312	-0.14724	-0.11066	-0.1279	-0.2637	-0.14405	-0.2328	-0.12877	-0.085724	0.0028018	-0.1353	-0.1866	0.050874	0.15099	-0.22517	-0.3745	-0.13757	-0.022286	-0.43315
Johnsonella	0.1555	-0.047444	0.14478	-0.058827	0.25738	0.26663	0.046719	-0.13941	0.34227	0.11352	0.048131	0.091645	0.40552	0.43318	0.21311	0.080325	-0.073906	0.20472	0.20505	0.26031	0.28814	0.11007	-0.053479	-0.080218	-0.32622	1	0.19892	0.55915	0.11339	0.17939	0.45992	0.0060743	0.13981	0.30967	-0.0028972	0.18563	-0.037435	0.10594	-0.0057764	0.39081	0.40188	0.40623	0.17591	0.034807	0.24901	0.29262	-0.13905	0.3411	0.26047
Kingella	-0.09731	-0.12662	0.23787	0.043134	0.048655	0.21428	-0.017663	-0.22706	0.523	0.055758	0.1995	-0.01087	0.16575	0.47987	0.43274	0.43461	0.074513	-0.15038	0.38274	0.048827	0.11197	-0.062253	-0.48526	-0.40438	-0.5284	0.19892	1	0.40383	0.28028	0.42382	0.49605	0.27865	-0.015662	0.039406	0.067181	0.088074	0.27498	0.015258	-0.026207	-0.11135	0.047834	0.040957	-0.1337	-0.20246	0.19706	0.20029	0.14019	0.0097331	0.33804
Lachnoanaerobaculu	-0.053334	-0.04719	0.496	-0.042554	0.069334	0.3805	0.049372	-0.38933	0.4149	0.092644	-0.026596	-0.069705	0.22075	0.52128	0.20898	0.26898	0.060537	-0.037815	0.17363	0.015053	0.12837	0.098798	-0.27128	-0.26064	-0.48937	0.55915	0.40383	1	0.087317	0.14115	0.51596	0.16917	0.12052	0.16148	0.12103	-0.072407	0.085108	0.23483	0.24418	0.14365	0.24983	0.44157	0.07268	-0.18642	0.34887	0.2243	0.021277	-0.022405	0.33349
Lactobacillus	-0.16328	-0.24929	0.058056	0.16647	0.21045	0.20919	0.25687	0.0036285	0.30399	0.35061	0.20266	0.14592	0.14091	0.36189	0.41028	0.20293	-0.20593	0.2929	0.12001	0.29085	0.45903	0.0218	-0.12304	-0.028951	-0.18095	0.11339	0.28028	0.087317	1	0.014495	0.28951	0.32473	0.37002	-0.085449	0.23918	0.37439	-0.057903	0.22121	0.17199	0.22996	0.086874	-0.0078542	-0.16849	-0.047108	0.18481	-0.13807	-0.15199	0.2918	0.48752
Lautropia	0.23108	-0.077415	-0.16733	0.066225	0.18858	-0.022969	-0.28927	-0.037185	0.16159	-0.023069	0.23046	0.10414	0.17101	0.082119	0.32114	0.19629	0.10767	-0.17673	0.30471	-0.11994	-0.1576	0.053192	-0.3894	-0.25695	-0.23576	0.17939	0.42382	0.14115	0.014495	1	0.27815	-0.015044	-0.25546	0.24423	-0.20378	-0.072118	0.29404	-0.17392	-0.2661	-0.16272	0	-0.086238	-0.11261	0.026525	-0.1008	0.17553	-0.007947	0.27735	0.052157
Leptotrichia	-0.015915	-0.1353	0.38196	0.058201	0.12732	0.29438	0.031777	-0.19629	0.64021	0.2275	0.26455	0.144	0.33072	0.65608	0.49295	0.31523	-0.17635	0.023147	0.43315	0.15273	0.32665	0.14608	-0.37037	-0.36508	-0.69312	0.45992	0.49605	0.51596	0.28951	0.27815	1	0.057092	0.098361	0.16955	0.25224	0.10083	0.16931	0.086844	0.0057149	0.12608	0.20709	0.19234	-0.08836	-0.029139	0.19338	0.33201	0.031746	0.11143	0.37832
Megasphaera	-0.32538	-0.018817	0.28923	-0.21334	-0.17173	0.0086847	0.46922	-0.18077	0.075121	0.11121	-0.21935	-0.12116	-0.021553	0.20132	-0.016865	0.16248	0.27358	-0.095306	-0.031138	0.10544	0.20575	-0.054303	-0.21334	-0.11118	-0.14724	0.0060743	0.27865	0.16917	0.32473	-0.015044	0.057092	1	0.4015	-0.22974	-0.087903	0.29041	0.033053	0.10204	0.35377	-0.041371	-0.11604	0.078257	0.02433	-0.45734	0.29486	-0.22928	0.08113	0	0.44839
Mogibacterium	-0.21266	0.0096245	0.27429	-0.098361	0.03082	0.27985	0.40278	-0.055475	0.13525	0.34129	-0.30738	-0.1983	0.19843	0.19058	-0.024152	-0.19391	-0.1999	0.32274	0.012741	0.32707	0.41059	0.13887	-0.012295	-0.036886	-0.11066	0.13981	-0.015662	0.12052	0.37002	-0.25546	0.098361	0.4015	1	-0.10368	0.14321	0.23431	-0.067624	0.32011	0.42165	0.20835	0.080204	0.2068	0.18666	-0.25546	0.43398	-0.067893	-0.02459	0.13317	0.44276
Moraxella	0.45631	-0.32287	-0.13719	0.1398	0.26544	0.23642	-0.24036	-0.044736	0.038669	-0.1198	0.31233	0.014992	0.20117	0.09221	-0.080134	-0.12807	-0.28533	-0.032533	0.20961	0.047139	-0.03005	-0.0029864	-0.0089236	-0.0089236	-0.1279	0.30967	0.039406	0.16148	-0.085449	0.24423	0.16955	-0.22974	-0.10368	1	-0.13858	-0.12147	0.09221	-0.14815	-0.11566	0.018902	0.30425	0.15494	0.075265	0.27402	0.053613	0.25086	-0.074363	0.25416	-0.043154
Mycobacterium	-0.1983	0.080774	0.22417	0.26944	0.01437	0.37694	0.07825	0.13795	0.34969	0.42434	0.091723	0.037562	0.064617	0.34396	0.19305	0.30136	-0.22369	0.3856	0.18119	0.20765	0.29601	0.094966	0.011465	-0.063059	-0.2637	-0.0028972	0.067181	0.12103	0.23918	-0.20378	0.25224	-0.087903	0.14321	-0.13858	1	0.2341	0	0.51914	0.080496	0.23982	0.09274	0.27372	0.040615	0.048792	0.15212	0.15828	0.017198	-0.048293	0.30891
Mycoplasma	-0.057771	-0.13907	-0.021664	0.12964	0.072214	0.041633	0.27527	0.24192	0.20887	0.2548	0.14405	0.090751	0.35425	0.18006	0.12531	0.19472	-0.16979	0.29933	0.33586	0.59107	0.56996	0.10123	0.06482	-0.021607	-0.14405	0.18563	0.088074	-0.072407	0.37439	-0.072118	0.10083	0.29041	0.23431	-0.12147	0.2341	1	0.043214	0.069298	-0.011669	0.37758	0.28941	0.039078	0.094764	0.075724	0.16227	-0.068695	-0.014405	0.40737	0.29108
Neisseria	-0.063661	-0.1353	0.1008	0.074074	0.15385	0.15675	-0.11267	-0.063661	0.16931	0.043197	0.1746	-0.18667	0.13012	0.037037	0.19005	0.098013	-0.26237	-0.20254	0.44412	0.0029946	-0.017817	0.023905	-0.18519	-0.22222	-0.2328	-0.037435	0.27498	0.085108	-0.057903	0.29404	0.16931	0.033053	-0.067624	0.09221	0	0.043214	1	-0.18267	0.1143	-0.075649	-0.052462	-0.16938	0.29721	0.1404	0.24106	-0.050465	-0.005291	0.022286	-0.049346
Olsenella	-0.16814	0.22504	0.21919	0.080855	0.15013	0.46738	0.25834	-0.051044	0.15872	0.29012	-0.15273	-0.0060374	0.055234	0.21861	0.040338	0.11994	-0.0097376	0.41923	-0.068272	0.20678	0.30589	0.12026	0.098823	0.14674	-0.12877	0.10594	0.015258	0.23483	0.22121	-0.17392	0.086844	0.10204	0.32011	-0.14815	0.51914	0.069298	-0.18267	1	0.31699	0.28227	0.11252	0.46795	0.15155	-0.086959	0.32985	0.13229	0.0089839	0.061266	0.3848
Oribacterium	-0.28651	-0.12526	0.36673	-0.10858	0.12893	0.34274	0.36508	-0.28651	0.017145	0.14619	-0.27432	-0.34853	0.055633	0.10858	-0.10264	-0.13448	-0.08827	0.13439	-0.12141	0.093803	0.19887	0.18935	0.01143	-0.04572	-0.085724	-0.0057764	-0.026207	0.24418	0.17199	-0.2661	0.0057149	0.35377	0.42165	-0.11566	0.080496	-0.011669	0.1143	0.31699	1	0.14829	0.080524	0.21085	0.29789	-0.22032	0.48927	-0.26967	-0.14859	-0.17538	0.27538
Parvimonas	-0.064613	0.093577	0.025283	0.1485	0.3343	0.26723	0.085667	0.20508	0.17091	0.30194	-0.036424	0.16663	0.5053	0.17651	0.072336	0.028055	-0.35531	0.67416	0.031938	0.5804	0.57554	0.036569	0.33902	0.098063	0.0028018	0.39081	-0.11135	0.14365	0.22996	-0.16272	0.12608	-0.041371	0.20835	0.018902	0.23982	0.37758	-0.075649	0.28227	0.14829	1	0.55854	0.27972	0.41686	0.25811	0.40961	0.095642	-0.3054	0.27312	0.15969
Peptoclostridium	0.052601	-0.095101	0.024916	0.21261	0.34606	0.19153	0.0090454	0.094128	0.22365	0.12924	0.12977	0.12525	0.59416	0.2347	0.0061988	-0.06912	-0.18406	0.45298	0.2146	0.44383	0.30994	0.02495	0.1353	-0.02485	-0.1353	0.40188	0.047834	0.24983	0.086874	0	0.20709	-0.11604	0.080204	0.30425	0.09274	0.28941	-0.052462	0.11252	0.080524	0.55854	1	0.35955	0.29064	0.23777	0.25436	0.19128	-0.26783	0.33893	0.13162
Peptococcus	-0.089231	0.17978	0.36556	-0.11196	0.083474	0.28211	0.21317	-0.30799	0.20383	0.2125	-0.23828	-0.078134	0.23828	0.27847	-0.083784	0.040244	0.074679	0.32968	0.014875	0.071492	0.14179	0.060527	0.054545	-0.10622	-0.1866	0.40623	0.040957	0.44157	-0.0078542	-0.086238	0.19234	0.078257	0.2068	0.15494	0.27372	0.039078	-0.16938	0.46795	0.21085	0.27972	0.35955	1	0.17143	-0.19547	0.33633	0.16141	-0.048803	0.034548	0.22014
Peptostreptococcus	-0.083225	0.025152	0.051009	0.029453	0.27115	0.22056	0.017543	0.099333	-0.013388	0.10201	-0.25972	-0.24562	0.27986	-0.045519	-0.22842	-0.25203	-0.24378	0.21964	0.099889	0.24247	0.17432	-0.059142	0.16333	0.061584	0.050874	0.17591	-0.1337	0.07268	-0.16849	-0.11261	-0.08836	0.02433	0.18666	0.075265	0.040615	0.094764	0.29721	0.15155	0.29789	0.41686	0.29064	0.17143	1	0.10188	0.49869	-0.024194	-0.31863	0.18689	-0.027747
Porphyromonas	0.39575	-0.14377	-0.40637	0.47417	0.23639	-0.0038282	-0.23431	0.43825	-0.029139	0.0057672	0.37881	0.21095	0.16015	-0.11921	0.098126	-0.04244	-0.40054	0.2144	0.13451	0.22789	0.038656	-0.026596	0.36821	0.26755	0.15099	0.034807	-0.20246	-0.18642	-0.047108	0.026525	-0.029139	-0.45734	-0.25546	0.27402	0.048792	0.075724	0.1404	-0.086959	-0.22032	0.25811	0.23777	-0.19547	0.10188	1	-0.12732	0.19149	-0.11391	0.31242	-0.23333
Prevotella	-0.27357	0.077415	0.32669	-0.082119	0.24701	0.47086	0.28059	-0.1992	0.18278	0.24222	-0.27815	-0.28572	0.42888	0.23046	-0.0029735	0.005305	-0.28856	0.27524	0.079608	0.34184	0.3925	0.090426	0.002649	-0.11921	-0.22517	0.24901	0.19706	0.34887	0.18481	-0.1008	0.19338	0.29486	0.43398	0.053613	0.15212	0.16227	0.24106	0.32985	0.48927	0.40961	0.25436	0.33633	0.49869	-0.12732	1	-0.037234	-0.11391	0.09245	0.26078
Propionibacterium	0.24234	-0.033266	0.029294	0.31607	0.093209	0.22262	-0.098613	-0.039947	0.35326	0.12143	0.20452	0.13119	0.26944	0.34794	0.17292	0.14894	0	0.14234	0.24772	0.11124	0.080498	0.037333	-0.14077	-0.18327	-0.3745	0.29262	0.20029	0.2243	-0.13807	0.17553	0.33201	-0.22928	-0.067893	0.25086	0.15828	-0.068695	-0.050465	0.13229	-0.26967	0.095642	0.19128	0.16141	-0.024194	0.19149	-0.037234	1	0.20452	0.099089	0.13487
Rothia	-0.03183	0.11321	0.17507	-0.021164	-0.32891	-0.0497	-0.066443	-0.13263	0	-0.12383	0.015873	0.058669	-0.16265	-0.015873	0.011878	0.29934	0.012903	-0.26619	0.12062	-0.026952	-0.14254	0.029217	-0.015873	-0.05291	-0.13757	-0.13905	0.14019	0.021277	-0.15199	-0.007947	0.031746	0.08113	-0.02459	-0.074363	0.017198	-0.014405	-0.005291	0.0089839	-0.14859	-0.3054	-0.26783	-0.048803	-0.31863	-0.11391	-0.11391	0.20452	1	-0.25788	-0.13159
Sarcina	0.33199	-0.10966	-0.26814	0.27698	0.42456	-0.10582	-0.041719	0.2873	0.047756	0.24606	0.18147	0.083441	0.34907	0.060491	0.17154	-0.066947	-0.16046	0.29598	0.32002	0.32795	0.18941	0.025571	0.13053	0.20057	-0.022286	0.3411	0.0097331	-0.022405	0.2918	0.27735	0.11143	0	0.13317	0.25416	-0.048293	0.40737	0.022286	0.061266	-0.17538	0.27312	0.33893	0.034548	0.18689	0.31242	0.09245	0.099089	-0.25788	1	0.14187
Selenomonas	-0.13744	-0.11731	0.2254	0.087727	0.10445	0.3526	0.34427	-0.06597	0.36736	0.39989	0.087727	0.041452	0.14608	0.54281	0.25541	0.1949	0.075772	0.20089	0.13352	0.20792	0.45236	0.1679	-0.32898	-0.23028	-0.43315	0.26047	0.33804	0.33349	0.48752	0.052157	0.37832	0.44839	0.44276	-0.043154	0.30891	0.29108	-0.049346	0.3848	0.27538	0.15969	0.13162	0.22014	-0.027747	-0.23333	0.26078	0.13487	-0.13159	0.14187	1
Shuttleworthia	-0.15868	-0.085648	-0.052894	0.26377	0.058771	-0.20329	0.16002	0.39376	0.12309	0.29989	0.14654	0.31906	0.22824	0.14654	0.12501	0.12325	-0.17154	0.36541	0.10933	0.39147	0.34871	-0.052964	0.18171	0.087922	0.087922	0.035547	-0.023893	-0.1591	0.55326	-0.12325	0.064476	0.2197	0.27242	-0.1384	0.16512	0.51862	-0.18171	-0.06635	-0.10763	0.34143	0.30589	-0.10813	-0.094921	0.11739	0	-0.14124	-0.14654	0.38797	0.17615
Slackia	-0.10626	0.19172	0.049587	-0.063586	0.12043	0.07147	0.39346	0.070838	0.12011	0.12305	-0.1625	0.014244	0.20271	0.14837	0.16654	0.035372	-0.13784	0.31681	0.21232	0.3119	0.35687	0.12768	0.1625	0.10598	0.021195	0.17853	0.093595	-0.035514	0.34793	-0.021223	0.049455	0.28086	0.36119	-0.1271	0.18372	0.49048	-0.091846	0.28791	-0.030525	0.27685	0.12536	0.30667	0.042904	-0.12027	0.17686	-0.014187	0.035325	0.31459	0.21232
Solobacterium	-0.35552	0.10186	0.31964	-0.14313	0.1533	0.4654	0.25931	-0.14351	0.16916	0.24787	-0.29277	-0.30168	0.12	0.18217	-0.007303	0.016287	-0.20098	0.24193	-0.060678	0.22094	0.31038	0.039192	-0.013012	0.045542	-0.16916	0.1085	0.03978	0.28125	0.23585	-0.25081	0.11711	0.30298	0.49135	-0.17191	0.39827	0.039853	0.13012	0.50079	0.61489	0.27217	0	0.27887	0.41155	-0.21824	0.61563	-0.19596	-0.19518	-0.082211	0.37081
Staphylococcus	0.0036836	0.092028	-0.033153	0.24982	0.16208	-0.13804	-0.24472	0.28364	0.022043	-0.12798	0.12491	0.30368	0.19952	-0.051434	0.061859	0.21337	-0.13738	0.076345	0.29315	0.22457	0.078355	-0.12172	0.27922	0.19839	0.06613	0.13368	0.033695	0.088644	-0.10051	0.11772	0.051434	-0.1544	-0.21343	-0.012392	-0.027864	0.13503	0.073478	0	-0.22222	0.32684	0.27225	-0.01196	0.19336	0.30166	-0.069896	0.11066	0.11756	0.25202	-0.17513
Stomatobaculum	-0.09793	-0.1977	0.24037	-0.11247	0.044514	0.23097	0.090495	-0.14838	0.30189	0.054771	0.14207	-0.10144	-0.024262	0.20126	0.20598	0.18078	-0.15399	-0.11653	0.27297	0.18427	0.19601	0.029715	-0.1835	-0.023678	-0.35517	0.068806	0.35288	0.23209	0.43726	0.068164	0.27229	0.32273	0.25448	0.02995	0.23089	0.22964	0.1835	0.20772	0.29091	-0.14106	-0.058693	0.032118	-0.07489	-0.163	0.17485	-0.15749	0.10655	0.13891	0.32818
Streptobacillus	0.2151	-0.071525	-0.31368	0.27412	0.53176	0.34016	-0.094354	0.1673	0.10726	0.055137	0.11918	-0.048055	0.49765	0.065549	0.033445	-0.14022	-0.34878	0.27047	0.12968	0.37775	0.16054	0.023931	0.13706	0.19069	-0.1311	0.27706	-0.0030363	0.065899	0.024455	0.17602	0.12514	-0.25382	-0.048466	0.45561	-0.03551	-0.0081116	0.14898	0.080945	-0.0064365	0.33449	0.39183	0.0064665	0.37092	0.42067	0.29536	0.28418	-0.29795	0.4016	-0.0092628
Streptococcus	0.050465	0.19077	-0.15139	-0.17748	-0.23639	-0.38282	0.10992	0.14077	-0.44768	-0.14418	-0.20397	0.1255	-0.2633	-0.37881	-0.30627	-0.13793	0.26272	0.055048	-0.45294	-0.017992	-0.086232	-0.031915	0.45298	0.41589	0.44238	-0.1312	-0.38602	-0.24235	-0.10871	-0.3183	-0.44768	0.05115	-0.0061557	-0.23232	-0.1349	0.11178	-0.46887	0.077964	-0.065809	0.011222	-0.060826	0.028746	-0.18768	-0.01061	-0.27586	-0.25	0.092715	0	-0.21137
Tannerella	-0.069707	-0.075353	0.34854	0.048131	0.048259	0.069556	0.072998	-0.23593	0.52409	0.2445	0.19787	0.16173	0.24112	0.57757	0.43222	0.49534	0.091296	-0.011698	0.3048	0.063563	0.24912	0.056377	-0.32087	-0.31018	-0.51875	0.45676	0.50138	0.54302	0.33286	0.2383	0.60966	0.18223	-0.0031068	0.0030065	0.11878	0.23295	-0.0053479	0.072644	-0.051988	0.13027	0.17582	0.20312	-0.19756	-0.14726	0.099067	0.21745	0.074871	0.18986	0.36854
Trichococcus	0.21514	0.055296	-0.27888	0.11921	0.01328	-0.23352	0.017356	0.31076	-0.31523	-0.051905	0.092715	0.056076	-0.13301	-0.3947	-0.17246	-0.16976	-0.090444	0.043459	-0.20314	-0.029986	-0.13381	0.079788	0.42649	0.44238	0.33113	-0.28649	-0.34013	-0.34887	-0.2138	-0.13263	-0.4106	-0.16849	-0.16313	-0.041699	-0.086104	-0.032453	0.050331	0.0089958	0.071531	0.050499	-0.077415	-0.1581	0.04826	0.35544	-0.15385	-0.17021	0.002649	-0.019128	-0.27176
Veillonella	-0.026525	-0.12425	0.26525	-0.10053	0.19629	0.12616	0.15311	-0.32891	0.19577	0.020158	-0.074074	-0.22401	-0.03253	0.24339	0.077209	-0.050331	0.07312	-0.069442	0.12062	-0.074866	0.12472	-0.10359	-0.19048	-0.079365	-0.24868	0.27274	0.2642	0.35107	0.20266	0.045033	0.29101	0.3095	0.15369	0.1398	-0.011465	-0.036011	0.20106	0.092834	0.29146	0.03082	0.013806	0.23253	0.21688	-0.11391	0.27815	-0.034529	-0.22222	0.14327	0.27963
[truncated: 10 more columns]
